# Supplementary material
Source: ML conference proceedings conference paper supplement (https://openaccess.thecvf.com/content/WACV2025/html/Dutta_SAM-Mamba_Mamba_Guided_WACV_2025_paper.html)
Supplement: Supplementary file 1 [file Dutta_SAM-Mamba_Mamba_Guided_WACV_2025_supplemental.pdf]

# SAM-Mamba: Mamba Guided SAM Architecture for Generalized Zero-Shot Polyp Segmentation

## Supplementary Material

Tapas Kumar Dutta<sup>1</sup>, Snehashis Majhi<sup>2</sup>, Deepak Ranjan Nayak<sup>3</sup>, and Debesh Jha<sup>4</sup>

<sup>1</sup> University of Surrey, United Kingdom <sup>2</sup> Côte d’Azur University, France

<sup>3</sup> Malaviya National Institute of Technology Jaipur, India <sup>4</sup> University of South Dakota, USA

### 1. Additional Quantitative Comparison

Table 1. Quantitative results comparison of SAM-Mamba with SOTA methods on ETIS dataset (unseen).

| Methods          | mDice $\uparrow$ | mIoU $\uparrow$ | $F_{\beta}^w \uparrow$ | $S_{\alpha} \uparrow$ | $E_{\phi}^{\max} \uparrow$ | MAE $\downarrow$ |
|------------------|------------------|-----------------|------------------------|-----------------------|----------------------------|------------------|
| U-Mamba [2]      | 74.0             | 66.8            | 72.3                   | 85.0                  | 87.0                       | 2.2              |
| SAM-H [1]        | 65.1             | 60.6            | 81.2                   | 76.7                  | 76.7                       | 2.0              |
| SAM-L [1]        | 72.6             | 67.6            | 84.9                   | 82.6                  | 82.6                       | 2.0              |
| <b>SAM-Mamba</b> | <b>84.8</b>      | <b>78.2</b>     | <b>85.5</b>            | <b>91.6</b>           | <b>93.3</b>                | <b>1.0</b>       |

In order to further assess the generalization capabilities of the model on unseen data, we perform experiments on the ETIS dataset, comparing our proposed SAM-Mamba against state-of-the-art (SOTA) methods such as U-Mamba and SAM. As shown in Table 1, SAM-Mamba consistently demonstrates superior performance across all metrics. Specifically, SAM-Mamba surpasses the next-best method, U=Mamba, by a significant margin of +11.4% on the mDice metric and +11.4% on mIoU. Similar improvements are observed for  $F_{\beta}^w$ ,  $S_{\alpha}$ , and  $E_{\phi}^{\max}$ , where SAM-Mamba achieves the highest scores of 85.5, 91.6, and 93.3, respectively. In addition, SAM-Mamba achieves the lowest Mean Absolute Error (MAE) with a value of 1.0, further validating its robustness. These results highlight the strength of our method in generalizing to unseen data in zero-shot scenarios, particularly in challenging medical image segmentation tasks.

To further evaluate the zero-shot generalization capability of SAM-Mamba, we conducted experiments on the CVC-300 and CVC-ColonDB datasets. As seen in Table 2, SAM-Mamba consistently outperforms all SOTA methods across both datasets. On the CVC-300 dataset, SAM-Mamba achieves the highest mDice and mIoU scores of 92.0% and 86.1%, respectively, outperforming U-Mamba by a margin of +19.5% on mDice and +22.1% on mIoU. Similar trends can be observed for  $F_{\beta}^w$ ,  $S_{\alpha}$ , and  $E_{\phi}^{\max}$ , where SAM-Mamba achieves the top scores across all metrics, including the lowest MAE of 0.6.

On the CVC-ColonDB dataset, SAM-Mamba also outperforms the other methods, achieving mDice and mIoU scores of 85.3% and 77.1%, respectively, representing an improvement of +34.3% and +33.1% over U-Mamba. SAM-Mamba also demonstrates superior performance in other metrics, including  $F_{\beta}^w$ ,  $S_{\alpha}$ , and  $E_{\phi}^{\max}$ , along with the lowest MAE of 1.7. These results further emphasize the robustness and generalization strength of SAM-Mamba in unseen medical image segmentation tasks.

To assess the performance of SAM-Mamba on seen datasets, we compared it against state-of-the-art (SOTA) methods on the Kvasir-SEG and CVC-ClinicDB datasets. As shown in Table 3, SAM-Mamba exhibits superior performance across all metrics on both datasets. On the Kvasir-SEG dataset, SAM-Mamba achieves the highest scores with mDice and mIoU of 92.4% and 87.3%, respectively, surpassing U-Mamba by +9.9% on mDice and +12.3% on mIoU. SAM-Mamba also leads in  $F_{\beta}^w$ ,  $S_{\alpha}$ , and  $E_{\phi}^{\max}$ , with the lowest MAE of 2.5.

On the CVC-ClinicDB dataset, SAM-Mamba again outperforms other methods, achieving mDice and mIoU scores of 94.2% and 88.7%, which represent improvements of +11.2% and +12.7% over U-Mamba. The method also excels in  $F_{\beta}^w$ ,  $S_{\alpha}$ , and  $E_{\phi}^{\max}$ , with the lowest MAE of 0.6. These results underscore the effectiveness and robustness of SAM-Mamba in segmentation tasks on seen datasets, demonstrating significant gains over existing SOTA methods.

### 2. Additional Qualitative Analysis

In this section we extend the notion of qualitative analysis provided in Figure 2 and 3 of main paper and visualize the segmentation results for additional samples of seen (*i.e.*, *Kvasir-SEG and Clinic-DB*) and unseen (*i.e.*, *CVC-300, CVC-ColonDB, and ETIS*) datasets. In order to derive detailed analytical insights, we choose a diverse set of samples pertaining to various shape, structure and texture of polyp region across seen and unseen dataset. By carefully

Table 2. Quantitative results comparison of SAM-Mamba with SOTA methods on CVC-300 and CVC-ColonDB datasets (unseen). ‘↑’ and ‘↓’ represent that larger or smaller scores are better. ‘Red’ and ‘Blue’ color fonts indicate the best and second best scores.

| Methods          | CVC-300 (Unseen) |             |                 |                |                     |            | CVC-ColonDB (Unseen) |             |                 |                |                     |            |
|------------------|------------------|-------------|-----------------|----------------|---------------------|------------|----------------------|-------------|-----------------|----------------|---------------------|------------|
|                  | mDice ↑          | mIoU ↑      | $F_{\beta}^w$ ↑ | $S_{\alpha}$ ↑ | $E_{\phi}^{\max}$ ↑ | MAE ↓      | mDice ↑              | mIoU ↑      | $F_{\beta}^w$ ↑ | $S_{\alpha}$ ↑ | $E_{\phi}^{\max}$ ↑ | MAE ↓      |
| Umamba [2]       | 72.5             | 64.0        | 70.0            | 85.5           | 87.5                | 2.0        | 51.0                 | 44.0        | 50.0            | 71.5           | 79.0                | 5.8        |
| SAM-H [1]        | 65.1             | 60.6        | 81.2            | 76.7           | 76.7                | 2.0        | 44.1                 | 39.6        | 43.4            | 67.6           | 58.7                | 5.6        |
| SAM-L [1]        | 72.6             | 67.6        | 84.9            | 82.6           | 82.6                | 2.0        | 46.8                 | 42.2        | 46.3            | 69.0           | 60.8                | 5.4        |
| <b>SAM-Mamba</b> | <b>92.0</b>      | <b>86.1</b> | <b>88.8</b>     | <b>94.6</b>    | <b>98.1</b>         | <b>0.6</b> | <b>85.3</b>          | <b>77.1</b> | <b>85.6</b>     | <b>89.8</b>    | <b>93.3</b>         | <b>1.7</b> |

Table 3. Quantitative results comparison of SAM-Mamba with SOTA methods on Kvasir-SEG and CVC-ClinicDB datasets (seen). ‘↑’ and ‘↓’ represent that larger or smaller scores are better. ‘Red’ and ‘Blue’ color fonts indicate the best and second best scores.

| Methods          | Kvasir-SEG (Seen) |             |                 |                |                     |            | CVC-ClinicDB (Seen) |             |                 |                |                     |            |
|------------------|-------------------|-------------|-----------------|----------------|---------------------|------------|---------------------|-------------|-----------------|----------------|---------------------|------------|
|                  | mDice ↑           | mIoU ↑      | $F_{\beta}^w$ ↑ | $S_{\alpha}$ ↑ | $E_{\phi}^{\max}$ ↑ | MAE ↓      | mDice ↑             | mIoU ↑      | $F_{\beta}^w$ ↑ | $S_{\alpha}$ ↑ | $E_{\phi}^{\max}$ ↑ | MAE ↓      |
| U-Mamba [2]      | 82.5              | 75.0        | 80.1            | 86.0           | 90.0                | 5.3        | 83.0                | 76.0        | 82.0            | 89.2           | 95.0                | 1.8        |
| SAM-H [1]        | 77.8              | 70.7        | 76.9            | 82.9           | 83.1                | 6.2        | 54.7                | 50.0        | 54.6            | 73.8           | 67.7                | 4.0        |
| SAM-L [1]        | 78.2              | 71.0        | 77.3            | 83.2           | 83.6                | 6.1        | 57.9                | 52.6        | 56.3            | 74.4           | 68.5                | 3.8        |
| <b>SAM-Mamba</b> | <b>92.4</b>       | <b>87.3</b> | <b>94.2</b>     | <b>93.6</b>    | <b>96.1</b>         | <b>2.5</b> | <b>94.2</b>         | <b>88.7</b> | <b>94.3</b>     | <b>95.5</b>    | <b>98.2</b>         | <b>0.6</b> |

observing Figure 1 to 10, we are convinced that the SAM-Mamba produce best segmentation results for all the scenarios considered which corroborates the learning and generalization ability of our method in seen and unseen dataset.

## References

- [1] Alexander Kirillov, Eric Mintun, Nikhila Ravi, Hanzi Mao, Chloe Rolland, Laura Gustafson, Tete Xiao, Spencer Whitehead, Alexander C Berg, Wan-Yen Lo, et al. Segment anything. In *Proceedings of the IEEE/CVF International Conference on Computer Vision*, pages 4015–4026, 2023. 1, 2
- [2] Jun Ma, Feifei Li, and Bo Wang. U-mamba: Enhancing long-range dependency for biomedical image segmentation. *arXiv preprint arXiv:2401.04722*, 2024. 1, 2

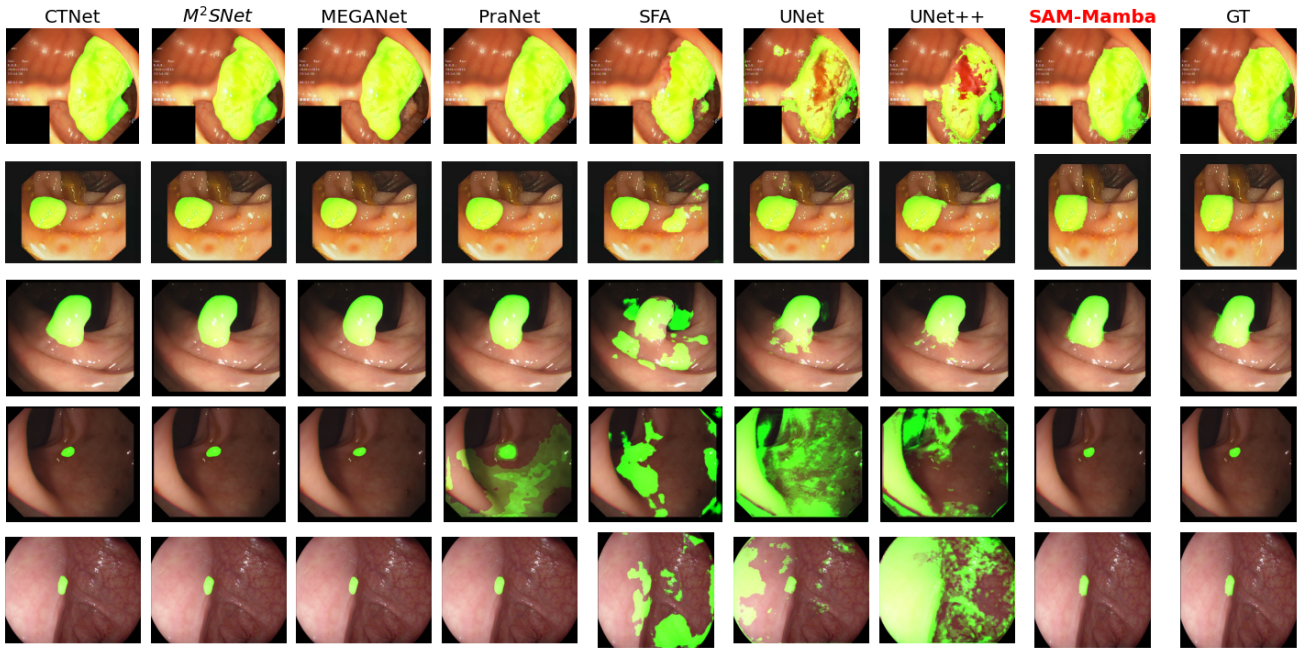

Figure 1. **Visualization and comparison** of segmentation results of state-of-the-art methods with SAM-Mamba (ours). Here, row-1 and 2 corresponds to the samples from seen datasets *i.e.*, Kvasir-SEG and Clinic-DB. Row-3, 4 and 5 corresponds to the samples from unseen datasets *i.e.* CVC-300, CVC-ColonDB, and ETIS.

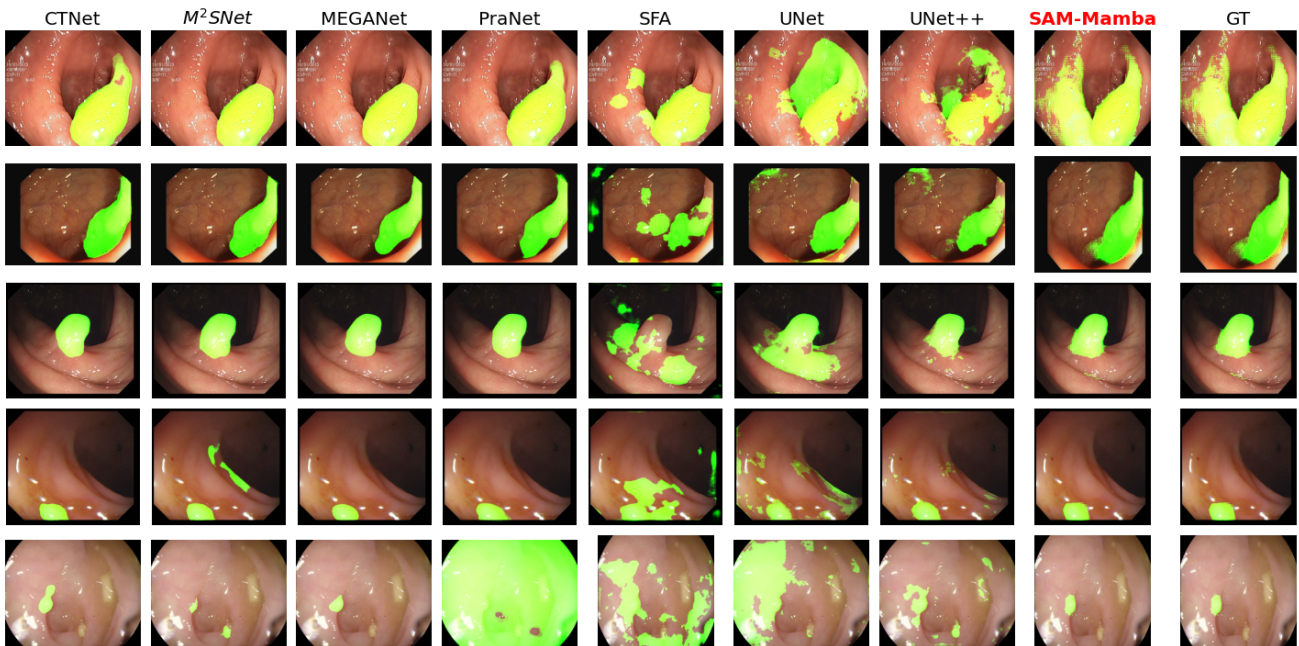

Figure 2. **Visualization and comparison** of segmentation results of state-of-the-art methods with SAM-Mamba (ours). Here, row-1 and 2 corresponds to the samples from seen datasets *i.e.* Kvasir-SEG and Clinic-DB. Row-3, 4 and 5 corresponds to the samples from unseen datasets *i.e.* CVC-300, CVC-ColonDB, and ETIS.

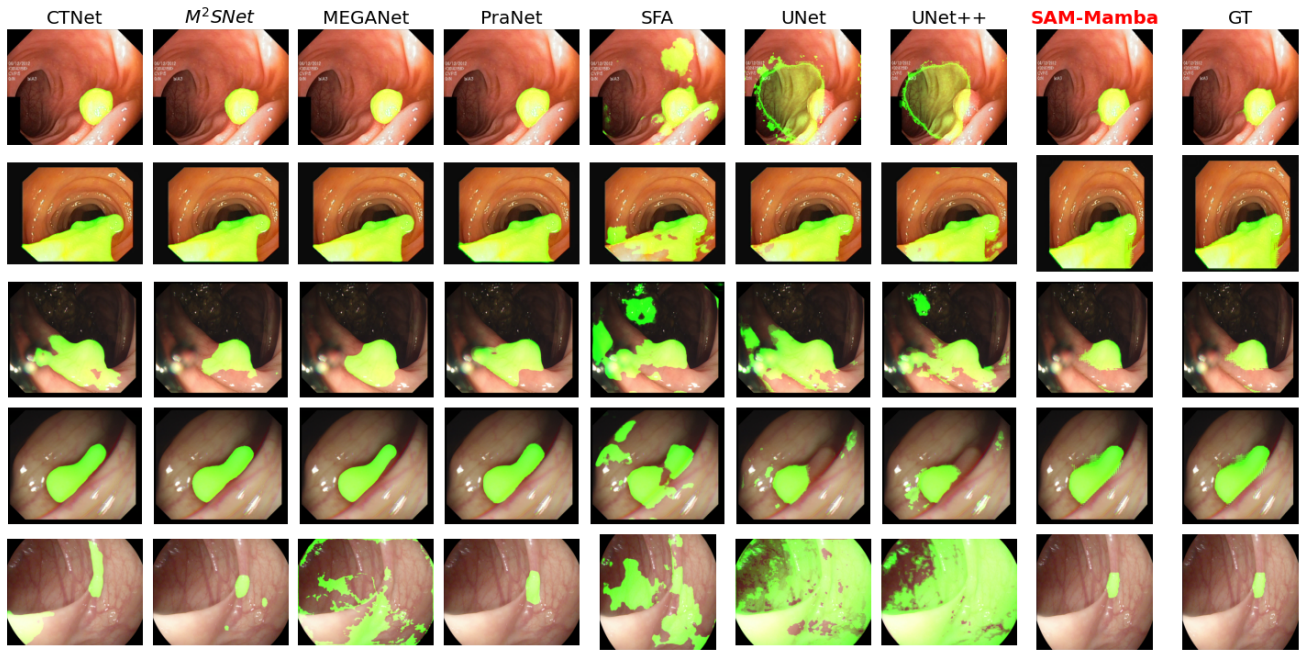

Figure 3. **Visualization and comparison** of segmentation results of state-of-the-art methods with SAM-Mamba (ours). Here, row-1 and 2 corresponds to the samples from seen datasets *i.e.* Kvasir-SEG and Clinic-DB. Row-3, 4 and 5 corresponds to the samples from unseen datasets *i.e.* CVC-300, CVC-ColonDB, and ETIS.

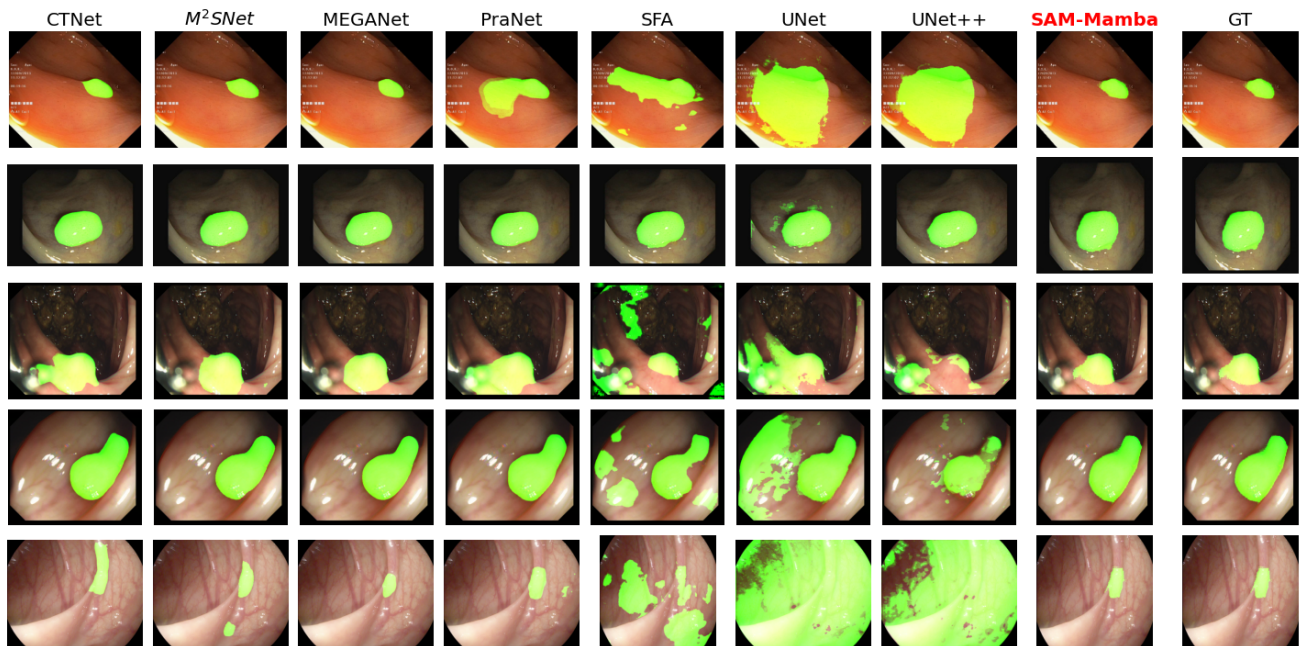

Figure 4. **Visualization and comparison** of segmentation results of state-of-the-art methods with SAM-Mamba (ours). Here, row-1 and 2 corresponds to the samples from seen datasets *i.e.* Kvasir-SEG and Clinic-DB. Row-3, 4 and 5 corresponds to the samples from unseen datasets *i.e.* CVC-300, CVC-ColonDB, and ETIS.

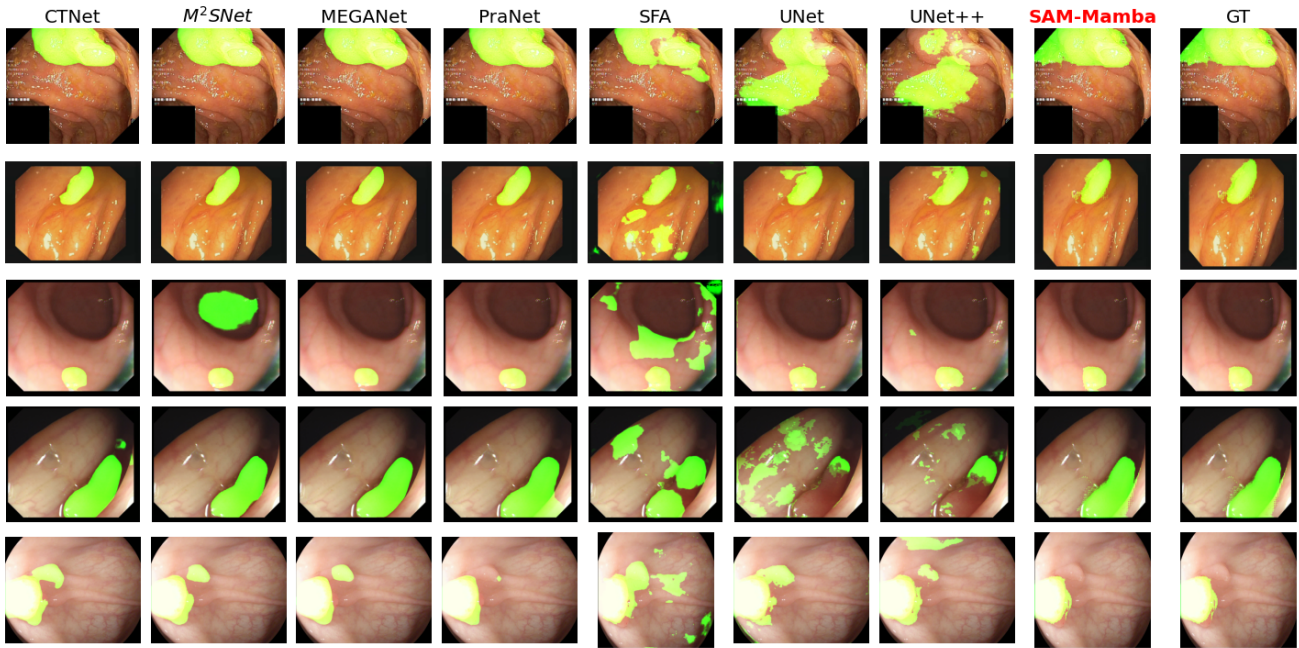

Figure 5. **Visualization and comparison** of segmentation results of state-of-the-art methods with SAM-Mamba (ours). Here, row-1 and 2 corresponds to the samples from seen datasets *i.e.* Kvasir-SEG and Clinic-DB. Row-3, 4 and 5 corresponds to the samples from unseen datasets *i.e.* CVC-300, CVC-ColonDB, and ETIS.

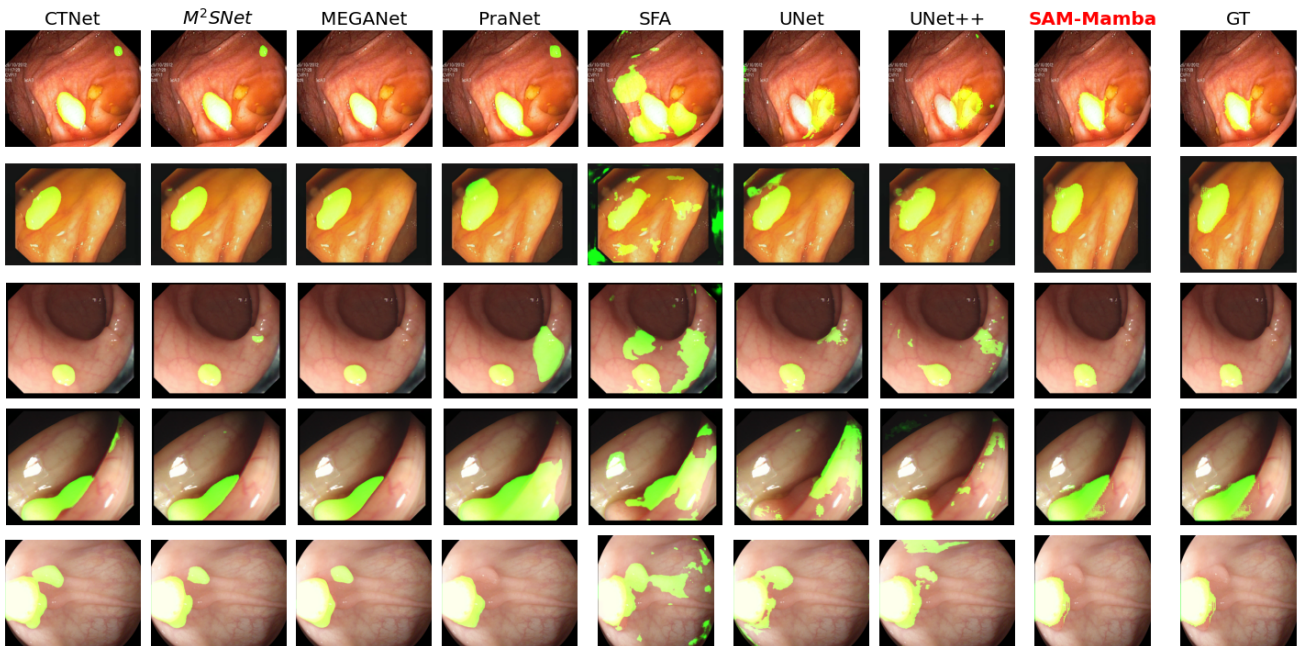

Figure 6. **Visualization and comparison** of segmentation results of state-of-the-art methods with SAM-Mamba (ours). Here, row-1 and 2 corresponds to the samples from seen datasets *i.e.* Kvasir-SEG and Clinic-DB. Row-3, 4 and 5 corresponds to the samples from unseen datasets *i.e.* CVC-300, CVC-ColonDB, and ETIS.

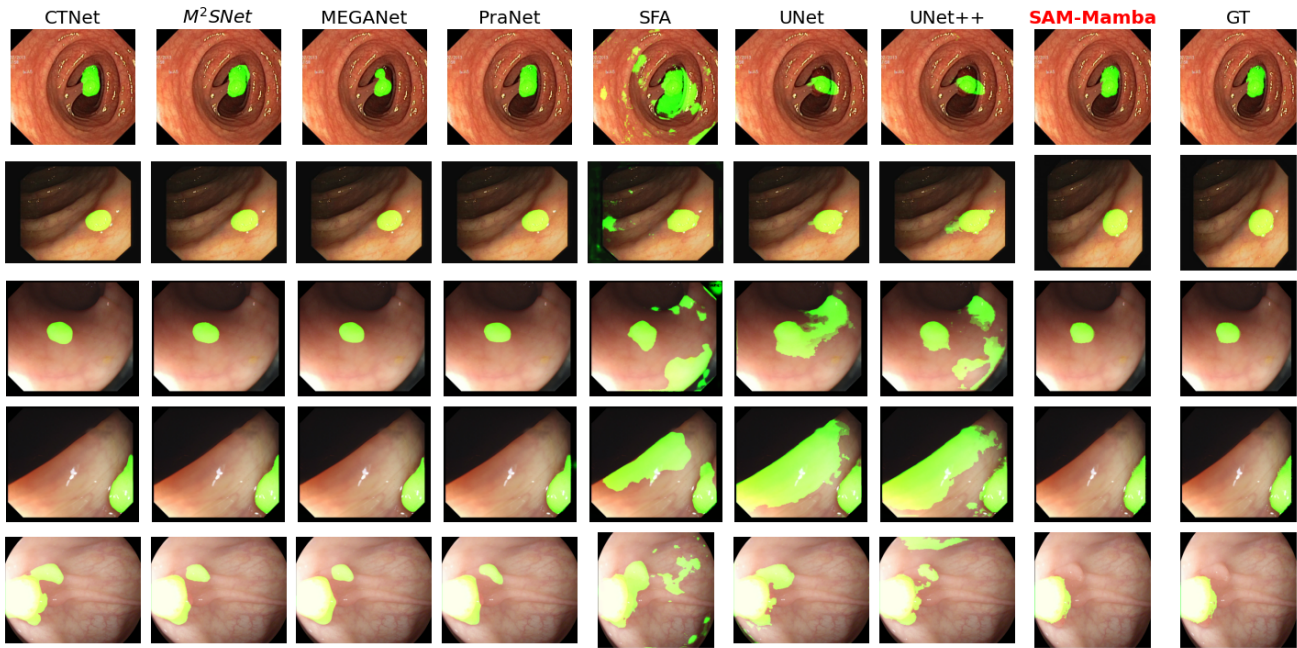

Figure 7. **Visualization and comparison** of segmentation results of state-of-the-art methods with SAM-Mamba (ours). Here, row-1 and 2 corresponds to the samples from seen datasets *i.e.* Kvasir-SEG and Clinic-DB. Row-3, 4 and 5 corresponds to the samples from unseen datasets *i.e.* CVC-300, CVC-ColonDB, and ETIS.

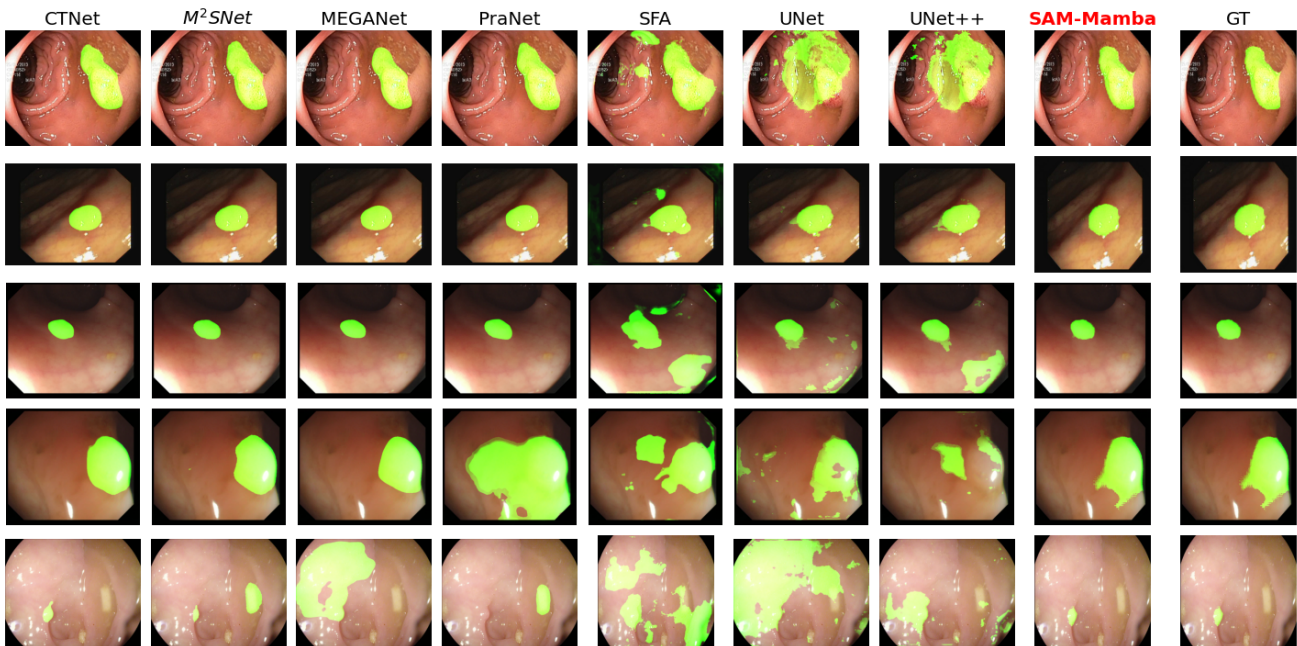

Figure 8. **Visualization and comparison** of segmentation results of state-of-the-art methods with SAM-Mamba (ours). Here, row-1 and 2 corresponds to the samples from seen datasets *i.e.* Kvasir-SEG and Clinic-DB. Row-3, 4 and 5 corresponds to the samples from unseen datasets *i.e.* CVC-300, CVC-ColonDB, and ETIS.

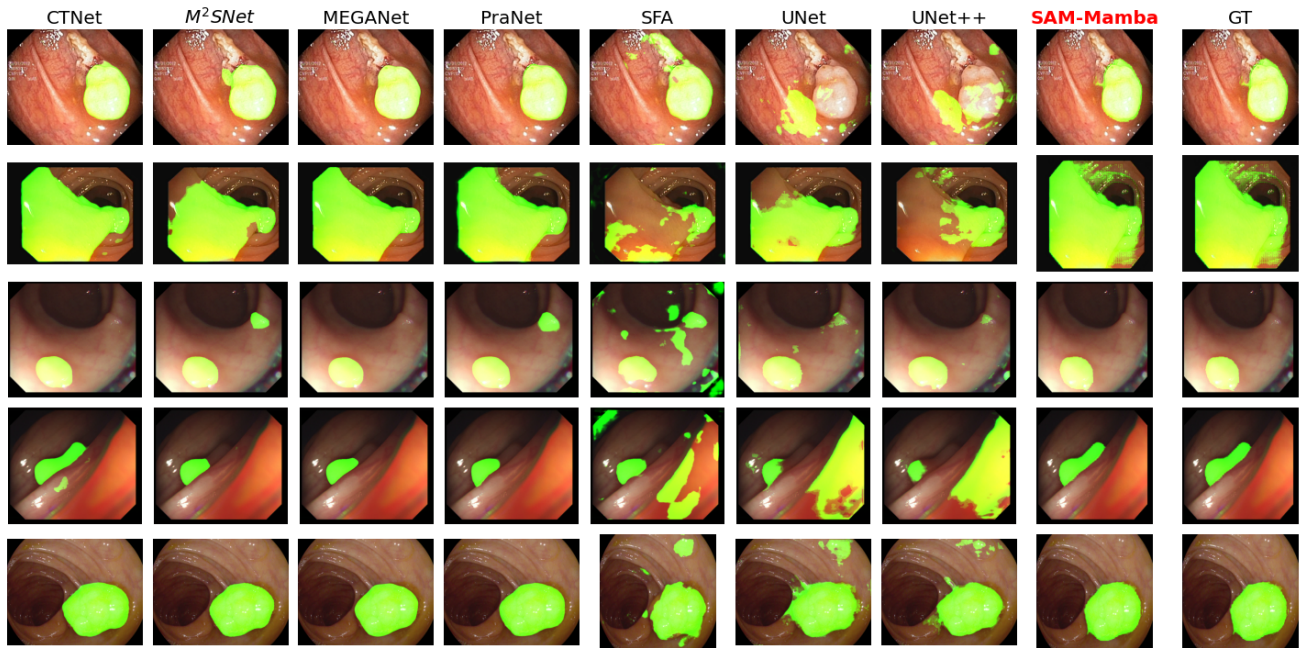

Figure 9. **Visualization and comparison** of segmentation results of state-of-the-art methods with SAM-Mamba (ours). Here, row-1 and 2 corresponds to the samples from seen datasets *i.e.* Kvasir-SEG and Clinic-DB. Row-3, 4 and 5 corresponds to the samples from unseen datasets *i.e.* CVC-300, CVC-ColonDB, and ETIS.

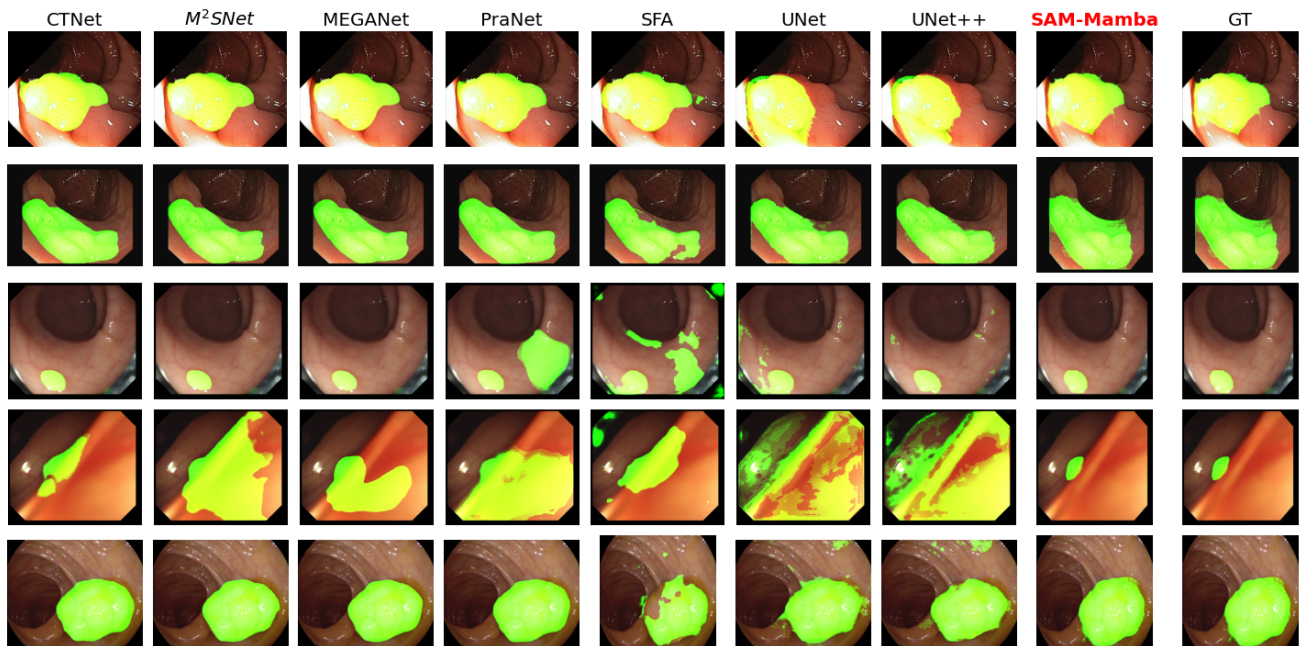

Figure 10. **Visualization and comparison** of segmentation results of state-of-the-art methods with SAM-Mamba (ours). Here, row-1 and 2 corresponds to the samples from seen datasets *i.e.* Kvasir-SEG and Clinic-DB. Row-3, 4 and 5 corresponds to the samples from unseen datasets *i.e.* CVC-300, CVC-ColonDB, and ETIS.
